# Supplementary material for: A self-powered and arch-structured triboelectric nanogenerator for portable electronics and human-machine communication
Source: Royal Society of Chemistry journal article supplement (doi:10.1039/d0ta02178d), 2020-01-01
Supplement: d0ta02178d1.pdf [file d0ta02178d1.pdf]

## Electronic Supplementary Information

### **A self-powered and arch-structured triboelectric nanogenerator for portable electronics and human-machine communication**

Xingxing Shi,<sup>ab</sup> Shuidong Zhang,<sup>\*a</sup> Shaoqin Gong<sup>\*bc</sup>

<sup>a</sup>School of Mechanical and Automotive Engineering, South China University of Technology, Guangzhou, Guangdong 510640, China

<sup>b</sup>Wisconsin Institute for Discovery, University of Wisconsin–Madison, Madison, Wisconsin 53706, USA

<sup>c</sup>Department of Biomedical Engineering, Department of Chemistry, Department of Materials Science and Engineering, University of Wisconsin–Madison, Madison, Wisconsin 53706, USA

\*Corresponding authors.

E-mail addresses: starch@scut.edu (S. Zhang), shaoqingong@wisc.edu (S. Gong).

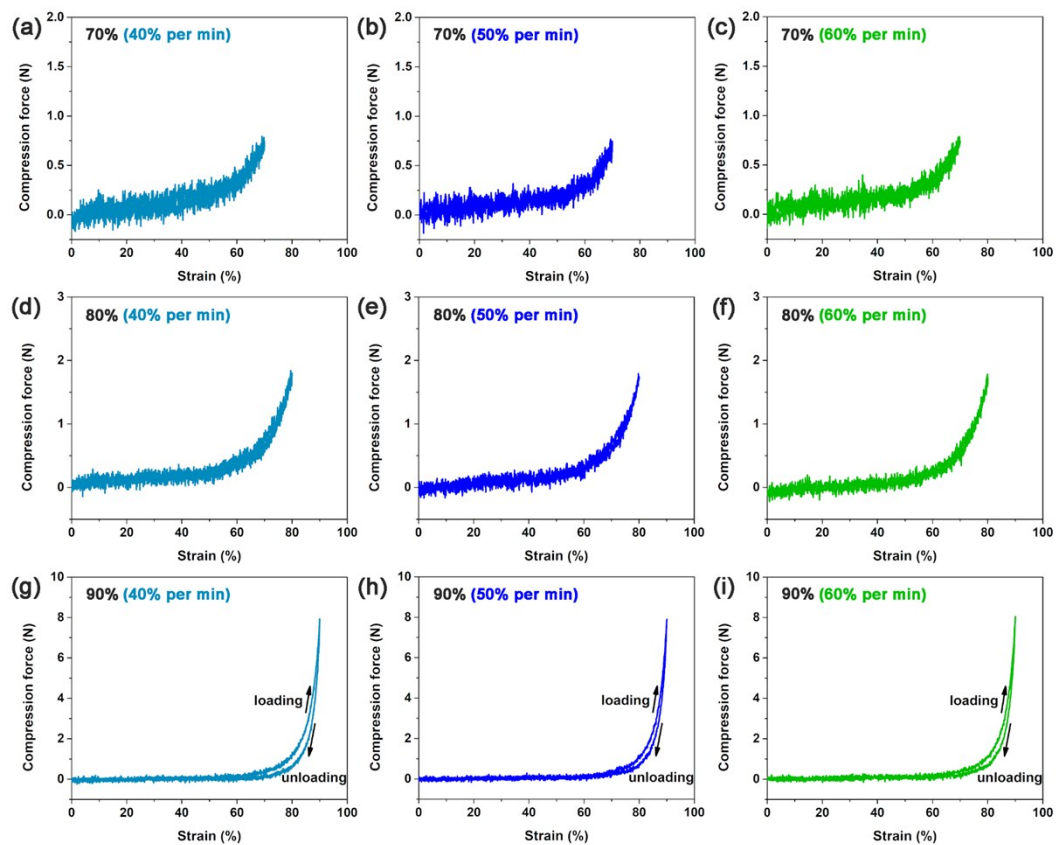

**Fig. S1** The compression curves of arch-structured TENGs under (a-c) 70% strains, (d-f) 80% strains, and (g-i) 90% strains at different cross-speeds (i.e., 40% per min, 50% per min, and 60% per min) after one compression–release cycle.

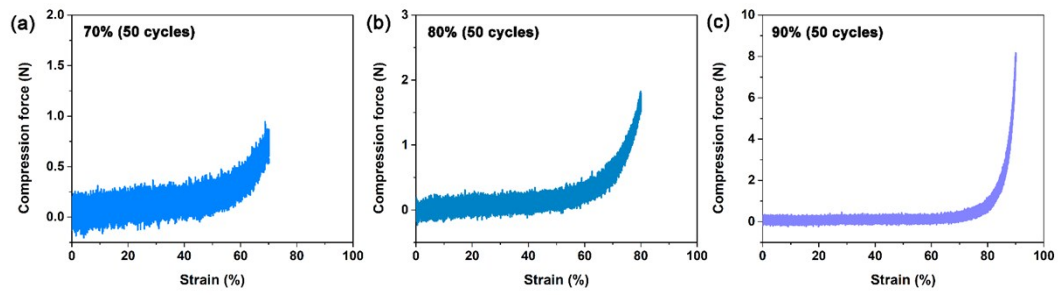

**Fig. S2** The cyclic compression curves of arch-structured TENGs under (a) 70% strains, (b) 80% strains and (c) 90% strains at a cross-speed of 50% per min for 50 compression–release cycles.

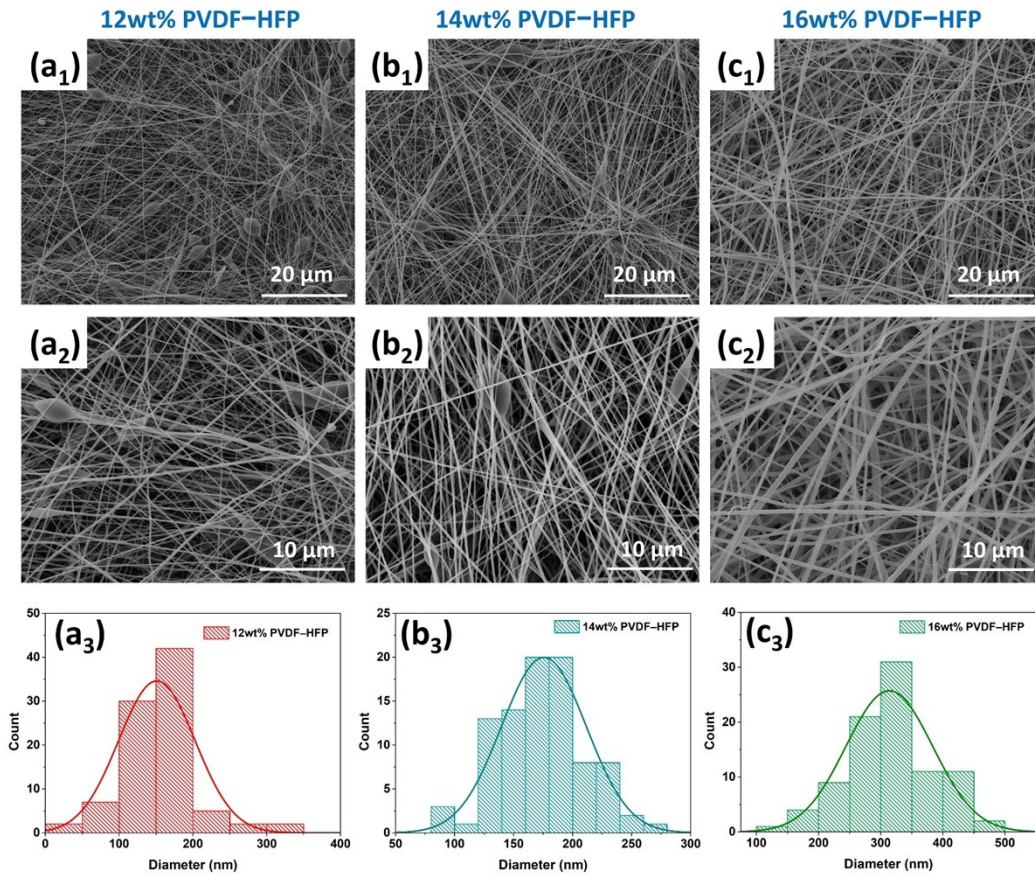

**Fig. S3** SEM images showing the microstructure of (a<sub>1</sub>, a<sub>2</sub>) 12 wt% PVDF-HFP, (b<sub>1</sub>, b<sub>2</sub>) 14 wt% PVDF-HFP and (c<sub>1</sub>, c<sub>2</sub>) 16 wt% PVDF-HFP nanofibrous membranes. Diameter distribution of (a<sub>3</sub>) 12 wt% PVDF-HFP, (b<sub>3</sub>) 14 wt% PVDF-HFP and (c<sub>3</sub>) 16 wt% PVDF-HFP nanofibrous membranes.

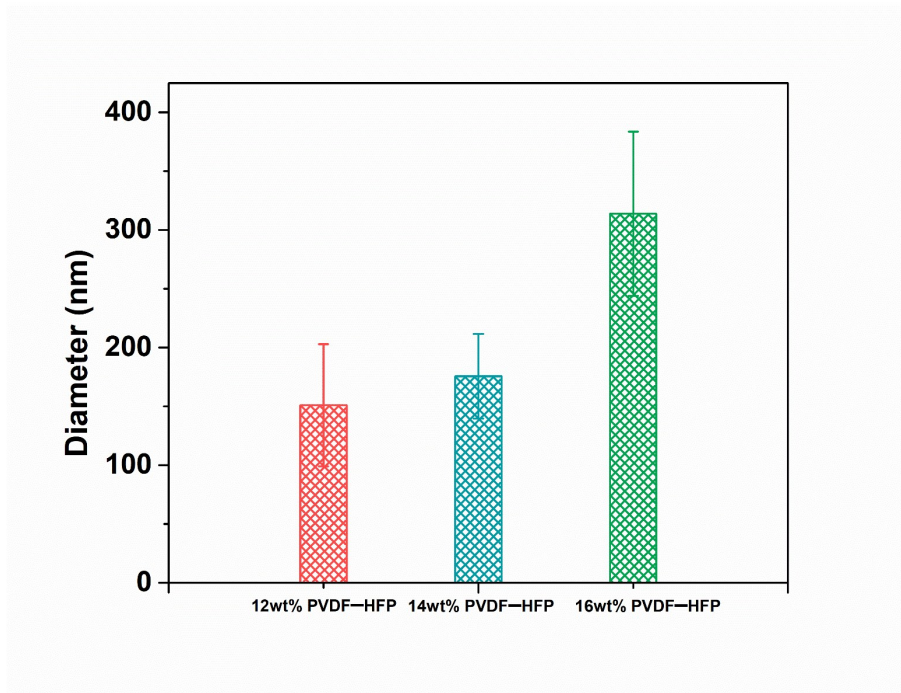

**Fig. S4** Average diameter of the PVDF-HFP nanofibrous membranes at different concentrations.

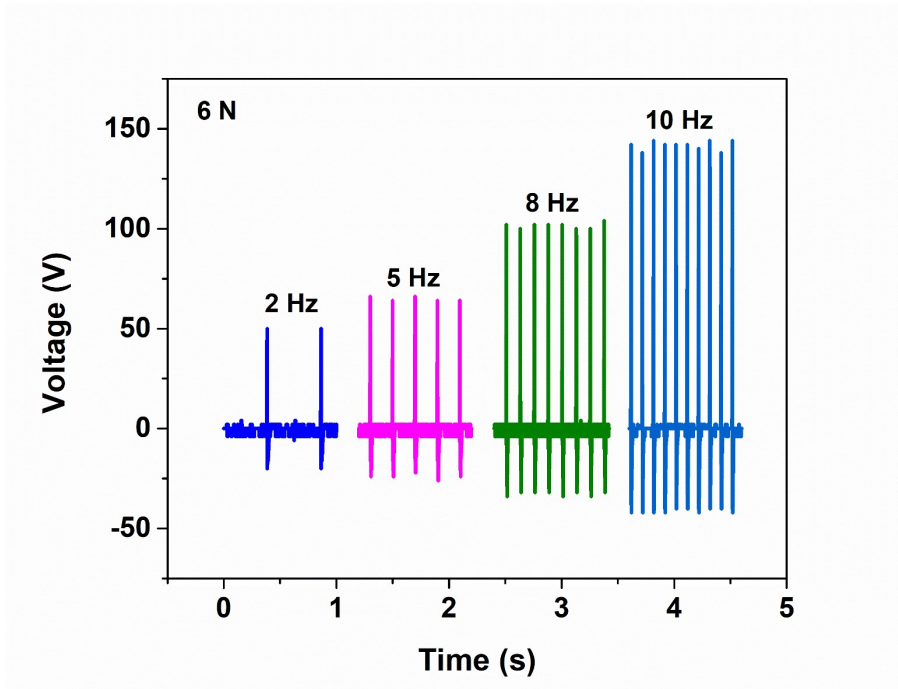

**Fig. S5** Output voltages of the TENG measured at different frequencies.

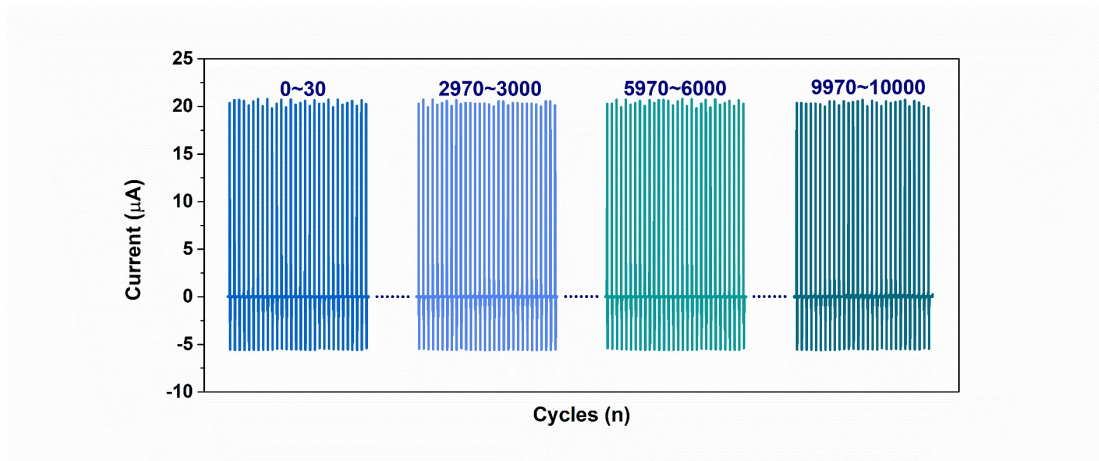

**Fig. S6** Output current of the TENG during 10 000 press and release cycles.

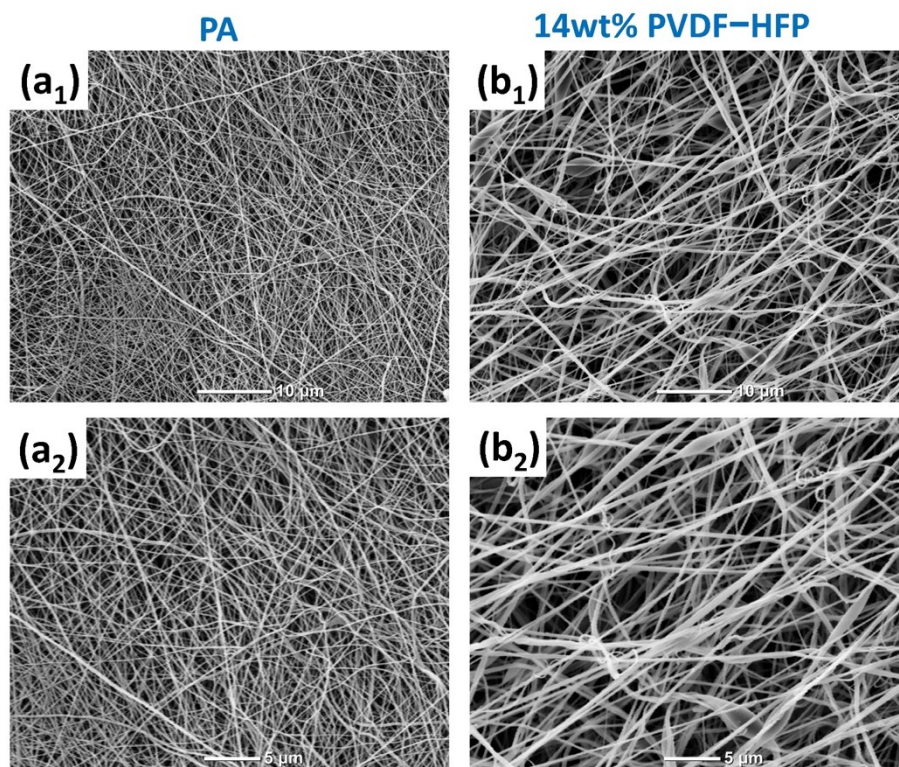

**Fig. S7** SEM images showing the microstructure of (a<sub>1</sub>, a<sub>2</sub>) PA and (b<sub>1</sub>, b<sub>2</sub>) 14 wt% PVDF-HFP membranes after 10 000 press and release cycles.



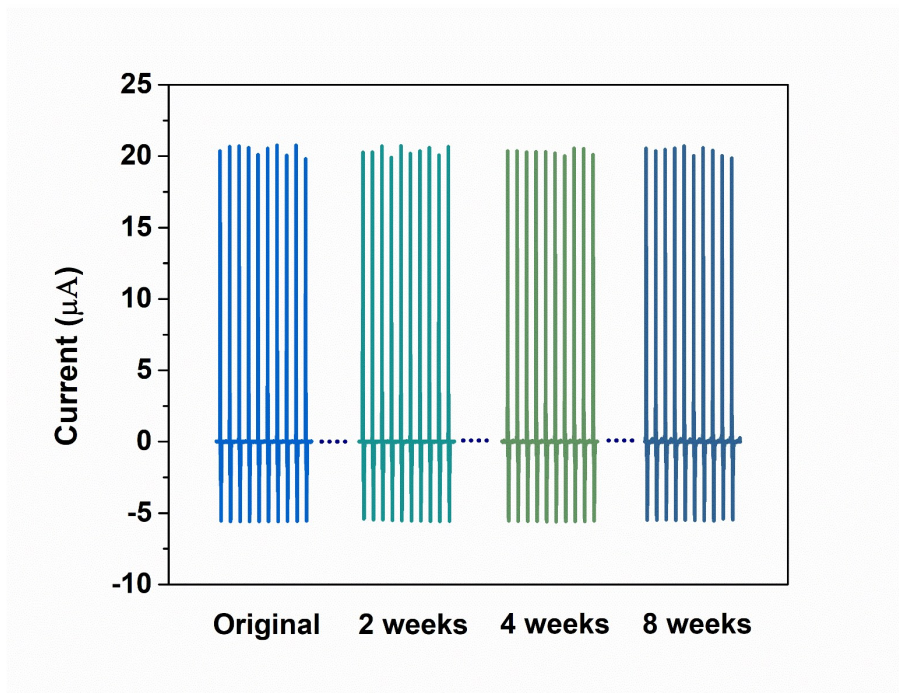

**Fig. S8** Output current of the TENG measured during various storage time (up to 8 weeks).

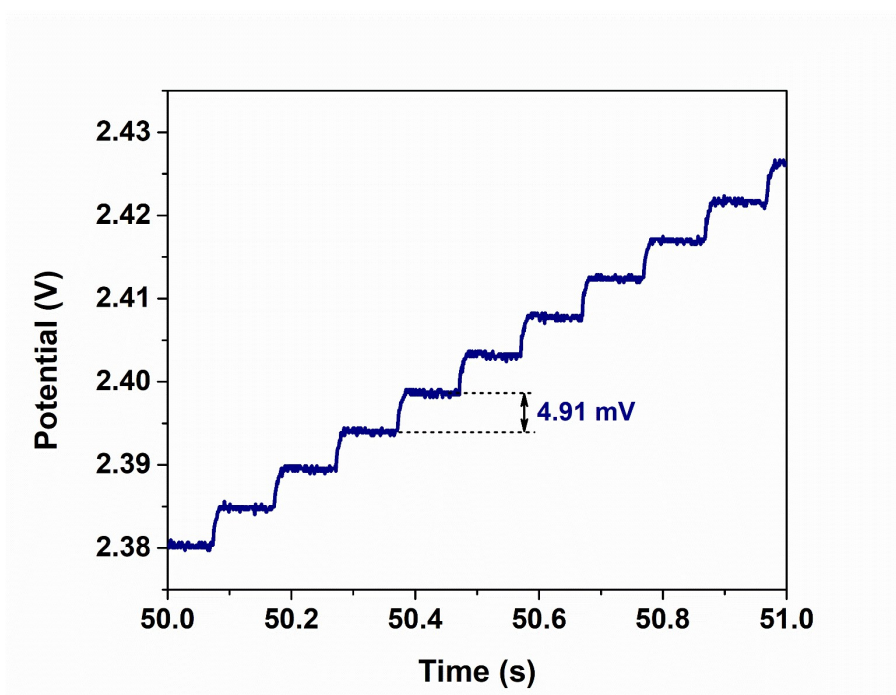

**Fig. S9** The enlarged charge curve of a 10  $\mu\text{F}$  capacitor that powered a calculator.

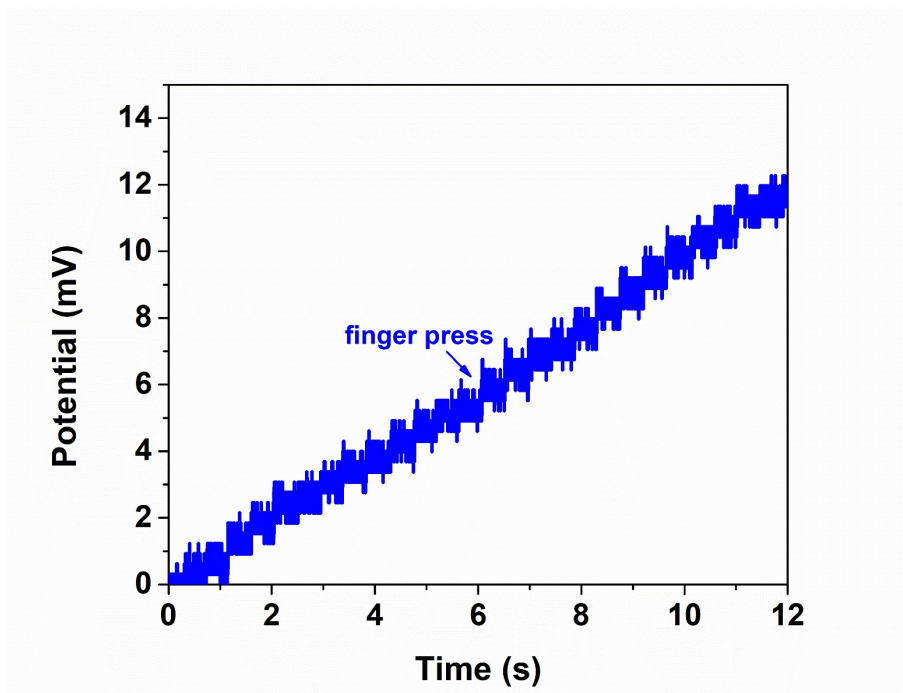

**Fig. S10** The stepwise increase in voltage of the capacitor charged by the TENG through finger pressing.

**Table S1.** Thicknesses of PA membranes with different layers and PVDF–HFP membranes with different concentrations.

| <b>Membranes</b> | <b>Thickness (<math>\mu\text{m}</math>)</b> |
|------------------|---------------------------------------------|
| 1 layer PA       | 9.6 $\pm$ 0.6                               |
| 2 layers PA      | 17.3 $\pm$ 2.3                              |
| 3 layers PA      | 24.6 $\pm$ 1.3                              |
| 4 layers PA      | 35.6 $\pm$ 4.3                              |
| 12 wt% PVDF–HFP  | 25.3 $\pm$ 1.6                              |
| 14 wt% PVDF–HFP  | 42.3 $\pm$ 3.3                              |
| 16 wt% PVDF–HFP  | 51.0 $\pm$ 4.3                              |

**Table S2.** Comparison of the output performances of the state-of-art TENGs with our TENG.

| Reference<br>s  | Voltage<br>(V) | Current<br>( $\mu$ A) | Power<br>Density<br>(W/m <sup>2</sup> ) | Area<br>(cm <sup>2</sup> ) | Force<br>(N) | Frequenc<br>y<br>(Hz) |
|-----------------|----------------|-----------------------|-----------------------------------------|----------------------------|--------------|-----------------------|
| [1]             | 120            | 4                     | 0.0725                                  | 4×4                        | 13           | 3                     |
| [2]             | 880            | 53.9                  | 5.2                                     | 7×7                        | 5            | 4                     |
| [3]             | 98.6           | 11.3                  | 0.0184                                  | 2×2                        | /            | 8                     |
| [4]             | 88             | 6.2                   | 0.004                                   | 3×3                        | 30           | /                     |
| [5]             | 118.4          | /                     | 1.0876                                  | $\pi \times 3^2$           | 10           | 10                    |
| [6]             | 115            | 9.5                   | 1.84                                    | 1×2                        | 6            | 10                    |
| [7]             | 112.7          | 1.98                  | 0.08                                    | 4×4                        | /            | 3                     |
| [8]             | 115.2          | 9.21                  | 0.13                                    | 3×3                        | /            | 3                     |
| [9]             | 500            | 12                    | 3.1                                     | 2×4                        | 25.6         | 2                     |
| [10]            | 1000           | 200                   | 17.17                                   | 10×10                      | /            | 2.5                   |
| [11]            | 124.6          | 10.13                 | 2.2                                     | 1×1.5                      | 20           | 4                     |
| [12]            | 1063           | 196                   | 14.8                                    | 4.5×4.5                    | 56           | 6                     |
| [13]            | 540            | 110                   | 14.8                                    | 4×4                        | 100          | 5                     |
| [14]            | 235.59         | 14.59                 | 6.74                                    | 4×4                        | 50           | 5                     |
| [15]            | 106.2          | 9.2                   | 13.3                                    | 1×2                        | 6            | 10                    |
| [16]            | 196.8          | 31.5                  | 16.1                                    | 2.5×2.5                    | 6            | 10                    |
| <b>Our work</b> | <b>141.6</b>   | <b>20.4</b>           | <b>31.96</b>                            | <b>1.5×1.5</b>             | <b>6</b>     | <b>10</b>             |

### Code 1: Code for switching an LED on and off by pressing the TENG

```
int analog_pin = 3;
int output_pin = 2;

int val_store = 0;
int val_cur = 0;

int state = 0;

void setup()
{
  Serial.begin(9600);
  analogReference(INTERNAL1V1);
  val_store = analogRead(analog_pin);
}

void loop()
{
  delay(1000);
  val_cur = analogRead(analog_pin);
  int diff=val_cur-val_store;
  Serial.println(diff);
  if (diff > 2)
  {
    if(state == 0){
      digitalWrite(output_pin,HIGH);
      state = 1;
    }else if(state = 1){
      digitalWrite(output_pin,LOW);
      state = 0;
    }
  }
}
```

```
    val_store=val_cur;
}
```

## **Code 2: Code for switching a motor with a propeller on and off by pressing the TENG**

```
int analog_pin = 3;
int output_pin = 2;

int val_store = 0;
int val_cur = 0;

int state = 0;

void setup()
{
    Serial.begin(9600);
    analogReference(INTERNAL1V1);
    val_store = analogRead(analog_pin);
}

void loop()
{
    delay(1000);
    val_cur = analogRead(analog_pin);
    int diff=val_cur-val_store;
    Serial.println(diff);
    if (diff > 2)
    {
        if(state == 0){
            analogWrite(output_pin,200);
            state = 1;
        }else if(state = 1){
```

```
    analogWrite(output_pin,0);  
    state = 0;  
  }  
}  
val_store=val_cur;  
}
```



**Video lists**

**Video S1.** Some electronics (e.g., LEDs, LCDs, and a flashlight) were directly lit up by the TENG.

**Video S2.** A calculator was powered using a capacitor charged by the TENG.

**Video S3.** A self-powered sensing system for turning an LED on and off by constantly pressing the TENG.

**Video S4.** A self-powered sensing system for turning a motor with a propeller on and off by constantly pressing the TENG.

**Video S5.** A self-powered TENG-based calculation system for human–machine communication.

## References

- 1 S. Parandeh, M. Kharaziha and F. Karimzadeh, *Nano Energy*, 2019, **59**, 412-421.
- 2 J. Xiong, P. Cui, X. Chen, J. Wang, K. Parida, M. F. Lin and P. S. Lee, *Nat. Commun.*, 2018, **9**, 4280.
- 3 N. Sun, Z. Wen, F. Zhao, Y. Yang, H. Shao, C. Zhou, Q. Shen, K. Feng, M. Peng, Y. Li and X. Sun, *Nano Energy*, 2017, **38**, 210-217.
- 4 A. Chandrasekhar, V. Vivekananthan, G. Khandelwal and S. J. Kim, *Nano Energy*, 2019, **60**, 850-856.
- 5 C. Jiang, C. Wu, X. Li, Y. Yao, L. Lan, F. Zhao, Z. Ye, Y. Ying and J. Ping, *Nano Energy*, 2019, **59**, 268-276.
- 6 H. Y. Mi, X. Jing, M. A. B. Meador, H. Guo, L. S. Turng and S. Gong, *ACS Appl. Mater. Interfaces*, 2018, **10**, 30596-30606.
- 7 Q. Qiu, M. Zhu, Z. Li, K. Qiu, X. Liu, J. Yu and B. Ding, *Nano Energy*, 2019, **58**, 750-758.
- 8 Z. Li, M. Zhu, Q. Qiu, J. Yu and B. Ding, *Nano Energy*, 2018, **53**, 726-733.
- 9 Y. Guo, X.-S. Zhang, Y. Wang, W. Gong, Q. Zhang, H. Wang and J. Brugger, *Nano Energy*, 2018, **48**, 152-160.
- 10 H.-J. Qiu, W.-Z. Song, X.-X. Wang, J. Zhang, Z. Fan, M. Yu, S. Ramakrishna and Y.-Z. Long, *Nano Energy*, 2019, **58**, 536-542.
- 11 H. Chen, L. Bai, T. Li, C. Zhao, J. Zhang, N. Zhang, G. Song, Q. Gan and Y. Xu, *Nano Energy*, 2018, **46**, 73-80.
- 12 J.-H. Zhang, Y. Li, J. Du, X. Hao and H. Huang, *J. Mater. Chem. A*, 2019, **7**, 11724-11733.
- 13 Z. Li, J. Shen, I. Abdalla, J. Yu and B. Ding, *Nano Energy*, 2017, **36**, 341-348.
- 14 Z. Zhang, Z. Bai, Y. Chen and J. Guo, *Nano Energy*, 2019, **58**, 759-767.
- 15 Hao-Yang Mi, Xin Jing, Qifeng Zheng, Liming Fange, Han-Xiong Huang, Lih-Sheng Turng and S. Gong, *Nano Energy*, 2018, **48**, 327-336.
- 16 S. Chen, J. Jiang, F. Xu and S. Gong, *Nano Energy*, 2019, **61**, 69-77.
